# Supplementary material for: Genome-Wide Screening of Genes Whose Enhanced Expression Affects Glycogen Accumulation in Escherichia coli
Source: PubMed Central journal article supplement — DNA Res. 2010 Jan 29;17(2):61–71. doi: 10.1093/dnares/dsp028 (PMC2853380; doi:10.1093/dnares/dsp028), 2010-01-29
Supplement: dsp028_1.pdf [file dsp028_1.pdf]

## Supplementary Legends

**Supplemental Figure 1:** Phenotypic analysis of colonies of the indicated ASKA clones grown at 28°C on LB agar without salt supplemented with (A) Congo Red or with (B) calcofluor. These clones have altered glycogen content when compared with WT cells and over-express functions that determine the aggregative and/or social behaviour modes of the cell. In “A”, enhanced expression of *yncG* resulted in upregulation of the rdar morphotype, which is ascribed to enhanced production of extracellular matrix components such as cellulose and adhesive curli.<sup>38</sup> In addition, the *yjcC* clone of the ASKA library displayed a pdar morphotype, which is ascribed to enhanced cellulose accumulation.<sup>39</sup> In “B”, ectopic expression of *yeaP*, *yjcC*, *galS* and *nagB* resulted in high calcofluor binding ability, indicating that ectopic expression of these genes exerts a positive effect on cellulose biosynthesis.

A

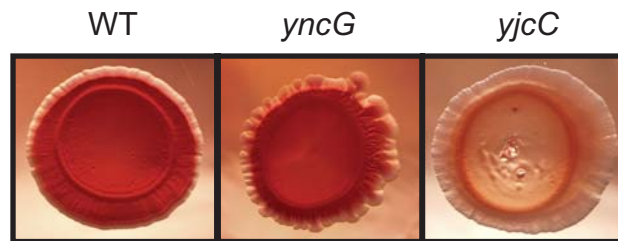

B

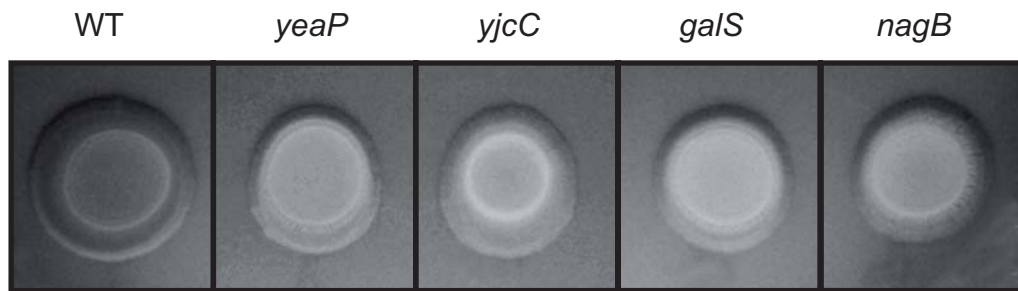

Supplemental Figure 1

**Supplemental Table 1:** List of genes of the ASKA library (and functions of their products) whose enhanced expression affect glycogen content.

| <b>Gene</b>  | <b>Function</b>                                                                                                |
|--------------|----------------------------------------------------------------------------------------------------------------|
| <i>aspP</i>  | ADP-sugar pyrophosphatase                                                                                      |
| <i>clpA</i>  | ClpA ATP-dependent protease specificity component and chaperone                                                |
| <i>cpdB</i>  | 2',3'-cyclic nucleotide 2'-phosphodiesterase / 3'-nucleotidase                                                 |
| <i>csrA</i>  | carbon storage regulator; pleiotropic regulatory protein for carbon source metabolism                          |
| <i>csrD</i>  | regulator of CsrB and CsrC decay                                                                               |
| <i>cydC</i>  | Component of cydDC glutathione ABC transporter                                                                 |
| <i>cysI</i>  | sulfite reductase, beta subunit, NAD(P)-binding                                                                |
| <i>cysP</i>  | Component of the CysATWP-Sbp sulfate transporter                                                               |
| <i>ddg</i>   | palmitoleoyl acyltransferase                                                                                   |
| <i>dos</i>   | phosphodiesterase, heme-regulated                                                                              |
| <i>erfK</i>  | L,D-transpeptidase responsible covalent attachment of peptidoglycan to the outer membrane                      |
| <i>exuR</i>  | transcriptional repressor of the operons involved in transport and catabolism of galacturonate and glucuronate |
| <i>galS</i>  | transcriptional repressor of the operons involved in transport and catabolism of galactose                     |
| <i>glgA</i>  | glycogen synthase                                                                                              |
| <i>glgB</i>  | glycogen branching enzyme                                                                                      |
| <i>glgC</i>  | glucose-1-phosphate adenylyltransferase                                                                        |
| <i>glgP</i>  | glycogen phosphorylase                                                                                         |
| <i>glgS</i>  | predicted glycogen synthesis protein                                                                           |
| <i>gltI</i>  | periplasmic binding component of glutamate ABC transporter                                                     |
| <i>gntT</i>  | high affinity gluconate transporter                                                                            |
| <i>gor</i>   | glutathione reductase                                                                                          |
| <i>gpp</i>   | guanosine-5'-triphosphate,3'-diphosphate pyrophosphatase                                                       |
| <i>gspD</i>  | putative member of the general secretory pathway (GSP)                                                         |
| <i>hokA</i>  | small toxic polypeptide                                                                                        |
| <i>holC</i>  | DNA polymerase III, $\chi$ subunit                                                                             |
| <i>hyuA</i>  | phenylhydantoinase                                                                                             |
| <i>malP</i>  | maltodextrin phosphorylase                                                                                     |
| <i>malT</i>  | transcriptional activator of genes and operons involved in maltose catabolism                                  |
| <i>mdtG</i>  | member of major facilitator superfamily (MFS). Drug transporter                                                |
| <i>methH</i> | Cobalamin-dependent homocysteine transmethylase                                                                |
| <i>mlc</i>   | global regulator of carbohydrate metabolism                                                                    |
| <i>nagB</i>  | glucosamine-6-phosphate deaminase                                                                              |
| <i>nagD</i>  | promiscuous ribo- and deoxyribonucleoside tri-, di-, and monophosphatase                                       |
| <i>napF</i>  | ferredoxin-type protein                                                                                        |
| <i>pfs</i>   | 5'-methylthioadenosine/S-adenosylhomocysteine nucleosidase                                                     |

|             |                                                                                       |
|-------------|---------------------------------------------------------------------------------------|
| <i>phr</i>  | deoxyribodipyrimidine photolyase (photoreactivation)                                  |
| <i>pnp</i>  | polynucleotide phosphorylase                                                          |
| <i>ppdB</i> | conserved protein                                                                     |
| <i>ppk</i>  | polyphosphate kinase                                                                  |
| <i>ppx</i>  | exopolyphosphatase                                                                    |
| <i>prfB</i> | peptide chain release factor RF2                                                      |
| <i>pspE</i> | thiosulfate sulfurtransferase                                                         |
| <i>pstC</i> | phosphate transporter subunit/membrane component of ABC superfamily                   |
| <i>ptsI</i> | PTS enzyme I                                                                          |
| <i>ptsN</i> | phosphotransferase system enzyme IIA, regulates N metabolism                          |
| <i>putP</i> | sodium/proline symporter responsible for the uptake of proline                        |
| <i>rbsR</i> | transcriptional repressor of the rbsDACBK operon involved in ribose metabolism        |
| <i>recQ</i> | ATP-dependent DNA helicase                                                            |
| <i>rpiB</i> | allose-6-phosphate isomerase / ribose-5-phosphate isomerase B                         |
| <i>rpoS</i> | alternative sigma factor $\sigma^S$                                                   |
| <i>rutF</i> | predicted flavin reductase implicated in pyrimidine degradation                       |
| <i>serB</i> | 3-phosphoserine phosphatase                                                           |
| <i>smg</i>  | conserved protein                                                                     |
| <i>spoT</i> | GDP diphosphokinase / guanosine-3',5'-bis(diphosphate) 3'-diphosphatase               |
| <i>ssuA</i> | alkanesulfonate ABC transporter                                                       |
| <i>talA</i> | Transaldolase                                                                         |
| <i>tdcA</i> | transcriptional activator of the <i>tdc</i> operon involved in amino acid degradation |
| <i>thrB</i> | homoserine kinase                                                                     |
| <i>tnaA</i> | L-cysteine desulfhydrase / tryptophanase                                              |
| <i>ucpA</i> | predicted oxidoreductase involved in sulfate metabolism protein                       |
| <i>wzc</i>  | tyrosine kinase involved in colanic acid biosynthesis                                 |
| <i>xylG</i> | ATP-binding component of the xylose ABC transporter                                   |
| <i>yabl</i> | conserved inner membrane protein                                                      |
| <i>yafV</i> | predicted C-N hydrolase family amidase, NAD(P)-binding                                |
| <i>ybcV</i> | DLP12 prophage; predicted protein                                                     |
| <i>ycbJ</i> | conserved protein                                                                     |
| <i>yciN</i> | predicted protein                                                                     |
| <i>ydcJ</i> | conserved protein                                                                     |
| <i>yeaP</i> | diguanylate cyclase                                                                   |
| <i>yegH</i> | putative transport protein                                                            |
| <i>yfaY</i> | conserved protein                                                                     |
| <i>yfdN</i> | CPS-53 (KpLE1) prophage; predicted protein                                            |
| <i>yfeD</i> | predicted DNA-binding transcriptional regulator                                       |
| <i>yfjR</i> | predicted DNA-binding transcriptional regulator                                       |
| <i>yhcE</i> | predicted protein, N-ter fragment (pseudogene)                                        |

|             |                                                                       |
|-------------|-----------------------------------------------------------------------|
| <i>yifJ</i> | lipid III flippase                                                    |
| <i>yjcC</i> | predicted signal transduction protein (EAL domain-containing protein) |
| <i>yjcQ</i> | predicted multidrug efflux system component                           |
| <i>ylcG</i> | Polypeptide: DLP12 prophage; predicted protein                        |
| <i>ymgC</i> | protein involved in biofilm formation                                 |
| <i>ynbD</i> | predicted phosphatase, inner membrane protein                         |
| <i>yncC</i> | predicted DNA-binding transcriptional regulator                       |
| <i>yncG</i> | predicted enzyme                                                      |
| <i>yoaE</i> | predicted inner membrane protein                                      |
| <i>yoeB</i> | toxin of the YoeB-YefM toxin-antitoxin pair                           |
| <i>yqjA</i> | Conserved inner membrane protein                                      |
